# Supplementary material for: Polyamines in Edible and Medicinal Fungi from Serbia: A Novel Perspective on Neuroprotective Properties
Source: MDPI journal article supplement (doi:10.3390/jof10010021), 2023-12-28
Supplement: s1 [file s1]

**Table S1.** Results of CHN analysis.

|                             | N (%)       | C (%)       | H (%)      |
|-----------------------------|-------------|-------------|------------|
| Acetanilide                 | 10.322±1.52 | 70.728±4.25 | 6.671±0.85 |
| <i>Clitocybe odora</i>      | 6.352±0.85  | 39.833±3.33 | 7.058±1.05 |
| <i>Clitopilus prunulus</i>  | 7.472±0.66  | 38.961±2.95 | 6.850±0.94 |
| <i>Lepista nuda</i>         | 7.585±0.94  | 39.317±2.38 | 6.930±1.12 |
| <i>Postia caesia</i>        | 2.979±0.13  | 40.830±3.01 | 6.751±1.35 |
| <i>Morchella elata</i>      | 5.539±0.51  | 37.860±2.77 | 6.647±0.98 |
| <i>Cyclocybe aegerita</i>   | 4.843±0.37  | 39.979±2.89 | 6.996±0.85 |
| <i>Ganoderma applanatum</i> | 2.759±0.35  | 42.669±2.91 | 6.035±1.45 |
| <i>Ganoderma resinaceum</i> | 2.182±0.35  | 40.373±1.56 | 6.210±0.51 |
